# Supplementary material for: Sulfoxide-directed thermal intramolecular [4 + 2] cycloadditions between 2-sulfinyl butadienes and unactivated alkynes
Source: Royal Society of Chemistry journal article supplement (doi:10.1039/b307485d), 2003-01-01
Supplement: b307485d.doc [file b307485d.doc]

### **Supplementary Information for**

Sulfoxide-Directed Thermal Intramolecular [4+2] Cycloadditions between 2-Sulfinylbutadienes and Unactivated Alkynes

Roberto Fernández de la Pradilla,* Raquel Baile and Mariola Tortosa

Instituto de Química Orgánica, CSIC, Juan de la Cierva, 3, 28006 Madrid, Spain.

Fax: 34-91-564-4853

E-mail: iqofp19@iqog.csic.es

**Materials and Methods**

Reagents and solvents were handled by using standard syringe techniques. Hexane, toluene and CH2Cl2 were distilled from CaH2, and THF and Et2O from sodium. Crude products were purified by flash chromatography on 230-400 mesh silica gel with distilled solvents. Analytical TLC was carried out on silica gel plates with detection by UV light, iodine, acidic vanillin solution, 10% phosphomolybdic acid solution in ethanol. Through this section, the volume of solvents is reported in mL/mmol of starting material. 1H and 13C NMR spectra were recorded at 200 or 300 MHz (1H) using CDCl3 as solvent and with the residual solvent signal as internal reference (CDCl3, 7.24 and 77.0 ppm). The following abbreviations are used to describe peak patterns when appropriate: s (singlet), d (doublet), t (triplet), q (quartet), m (multiplet), br (broad). Melting points are uncorrected. Optical rotations were measured at 20 ºC using a sodium lamp and in CHCl3 solution. Low resolution mass spectra were recorded using the electrospray (ES) chemical ionization technique in its positive or negative modes.

**1. Synthesis and Diels-Alder reaction of sulfinyl dienynes**

**General procedure for the synthesis of dienyne ethers**

To a solution of the corresponding dienyl sulfoxide in CH2Cl2 (10 mL/mmol of sulfoxide), 3 equiv of propargyl bromide (80% wt), 0.2 equiv of Triton B (40% wt) and 60% aqueous sodium hydroxide (10 mL/mmol of sulfoxide) were added. The mixture was vigorously stirred at room temperature and monitored by TLC until starting material disappearance. Then the reaction mixture was filtered, a saturated solution of NaCl (5 mL/mmol of sulfoxide) was added and the layers were separated. The aqueous phase was extracted twice with CH2Cl2 and the combined organic extracts were dried over MgSO4 and filtered to give, after evaporation of the solvents, a crude product that was purified by chromatography on silica gel using the appropriate mixture of solvents.

**General procedure for Mitsunobu-type reaction of 1-Hydroxy-(2,4)-dienyl sulfoxides1a, b**

To a solution of the dienyl sulfoxide, 1.5 equiv of Ph3P (recrystallized) and 1.1 equiv of the propargylic derivative in anhydrous THF or benzene (10 mL/mmol of sulfoxide), under an argon atmosphere, 1.5 equiv of diisopropyl azodicarboxylate was added dropwise. The reaction was monitored by TLC until starting material disappearance, the solvent was removed and the crude product was purified by chromatography on silica gel using the appropriate mixture of solvents.

**General procedure for the thermal Diels-Alder reaction of sulfinyl dienynes**

A kimble vial equipped with a stirring bar was charged with a solution of the corresponding dienyne and 0.2 equiv of 2,6-Di-*tert*-butyl-4-methylphenol in anhydrous toluene (10 mL/mmol of dienyne). Argon was bubbled through the solution for 15 min using a needle, and the vial was quickly stoppered. The vial was then immersed in a preheated oil bath (80-90 ºC) and the reaction was monitored by TLC until starting material disappearance. The solvent was removed and the crude product was purified by chromatography using the appropriate mixture of solvents.

**1.1. Synthesis of ()-4-Oxa-8-(*RS*)-(*p*-tolylsulfinyl)-6-(*E*)-8-(*Z*)-tridecadien-1-yne, 2a, (+)-(3a*R*,6*R*,*SS*)-6-*n*-Butyl-5-(*p*-tolylsulfinyl)-1,3,3a,6-tetrahydroisobenzofuran, 3a, and ()-(3a*S*,6*S*,*SS*)-6-*n*-Butyl-5-(*p*-tolylsulfinyl)-1,3,3a,6-tetrahydroisobenzofuran, 4a.**

From (–)-2(*E*)-4-(*Z*)-4-(*RS*)-(*p*-Tolylsulfinyl)nona-2,4-dien-1-ol (835 mg, 3.00 mmol), **1a**, propargyl bromide (1.29 mL, 1785 mg, 12.00 mmol), Triton B (0.30 mL, 275 mg, 0.60 mmol) and 60% aqueous sodium hydroxide (15 mL) following the general procedure (5 h) compound **2a** was obtained. Purification by chromatography (20-50% EtOAc-hexane) afforded 518 mg (1.86 mmol, 62%) of **2a** as a yellow oil, 92 mg (0.33 mmol, 11%) of a 67:33 mixture of **3a** and **4a** and 84 mg (0.30 mmol, 10%) of starting material.

Data of **2a**: ***Rf*** = 0.22 (30% EtOAc-hexane). **[]20D** = –161.1 (*c* = 1.11). **1H NMR (300 MHz)**  0.93 (t, 3 H, *J* = 7.0 Hz, Me-*n*-Bu), 1.33-1.54 (m, 4 H, 2 CH2-*n*-Bu), 2.35-2.37 (m, 4 H, Me-*p*-Tol, H-1), 2.49 (m, 1 H, 1 H-10), 2.71 (m, 1 H, 1 H-10), 3.90 (dd, 2 H, *J* = 2.4, 1.4 Hz, 2 H-3), 3.98 (ddd, 2 H, *J* = 5.6, 4.1, 1.3 Hz, 2 H-5), 5.98 (dt, 1 H, *J* = 15.9, 5.9 Hz, H-6), 6.12 (dd, 1 H, *J* = 15.7, 0.8 Hz, H-7), 6.24 (dd, 1 H, *J* = 8.3, 7.4 Hz, H-9), 7.25 (d, 2 H, *J* = 8.1 Hz, *p*-Tol), 7.39 (d, 2 H, *J* = 8.3 Hz, *p*-Tol). **13C NMR (50 MHz)**  13.8 (Me-*n*-Bu), 21.3 (Me-*p*-Tol), 22.3, 28.6, 31.5, 56.7, 69.6, 74.4, 79.5, 124.2 (2 C), 124.4, 128.3, 129.5, 129.8 (2 C), 139.0, 140.6, 142.1. **IR** (film): 3292, 3036, 2955, 2929, 2859, 1595, 1492, 1465, 1399, 1379, 1303, 1178, 1147, 1083, 1049, 1014, 899, 844, 810, 705 cm1. **MS** (ES): 633 [2M+1]+, 317 [M+1]+ (100%).

To a solution of **2a** (492 mg, 1.55 mmol) in 16 mL of CH2Cl2, under an argon atmosphere, ZnBr2 (1400 mg, 6.20 mmol) was added and the mixture was stirred at room temperature until starting material disappearance (3 days) was observed by TLC. Then 5% aqueous NaHCO3 (8 mL) and water (8 mL) was added, the layers were separated and the aqueous phase was extracted twice with CH2Cl2. The combined organic extracts were washed with a saturated solution of NaCl, dried over MgSO4 and filtered to give, after evaporation of the solvent, a 73:27 mixture of **3a** and **4a** with traces of the 4-Oxo-8-(*RS*)-(*p*-tolylsulfinyl)-6-(*E*)-8-(*E*)-tridecadien-1-yne **2a'**. Purification by chromatography (10-50% EtOAc-hexane) afforded 5 mg of **2a'** as a colorless oil, 47 mg (0.15 mmol, 10%) of **4a** as a colorless oil, with traces of the aromatized derivative **6a**, 168 mg (0.53 mmol, 34 %) of a mixture of **3a** and **4a** and 172 mg (0.54 mmol, 35%) of **3a** as a white solid that was recrystallized from Et2O-hexane.

In a related experiment a solution of **2a** in CDCl3 was kept at room temperature and monitored by 1H NMR until cycloaddition was complete (10 days), affording a 67:33 mixture of **3a** and **4a**.

Data of **2a'**: ***Rf*** = 0.27 (30% EtOAc-hexane). **1H NMR (300 MHz)**  0.89 (t, 3 H, *J* = 7.1 Hz, Me-*n*-Bu), 1.22-1.55 (m, 4 H, 2 CH2-*n*-Bu), 2.25-2.39 (m, 3 H), 2.35 (s, 3 H, Me-*p*-Tol), 3.94 (d, 2 H, *J* = 2.4 Hz, 2 H-3), 4.00 (d, 2 H, *J* = 5.6 Hz, 2 H-5), 5.89 (dt, 1 H, *J* = 16.3, 5.6 Hz, H-6), 6.20 (d, 1 H, *J* = 16.3 Hz, H-7), 6.50 (t, 1 H, *J* = 7.6 Hz, H-9), 7.22 (d, 2 H, *J* = 8.1 Hz, *p*-Tol), 7.46 (d, 2 H, *J* = 8.2 Hz, *p*-Tol).

Data of **3a**: **mp**: 83-85 ºC. ***Rf*** = 0.22 (50% EtOAc-hexane). **[]20D** = +179.2 (*c* = 1.00). **1H NMR (300 MHz)**  0.87 (t, 3 H, *J* = 7.0 Hz, Me-*n*-Bu), 1.08-1.38 (m, 4 H, 2 CH2-*n*- Bu), 1.57-1.67 (m, 2 H, CH2-*n*-Bu), 2.39 (s, 3 H, Me-*p*-Tol), 2.58 (m, 1 H, H-6), 3.32-3.34 (m, 2 H, H-3a, 1 H-3), 4.25-4.41 (m, 3 H, 1 H-3, 2 H-1), 5.36 (br s, 1 H, H-7), 6.86 (t, 1 H, *J* = 2.2 Hz, H-4), 7.23 (d, 2 H, *J* = 8.1 Hz, *p*-Tol), 7.53 (d, 2 H, *J* = 8.1 Hz, *p*-Tol). **13C NMR (50 MHz)**  13.9 (Me-*n*-Bu), 21.5 (Me-*p*-Tol), 22.8, 26.4, 31.7, 36.0, 41.0, 69.0, 71.4, 119.1, 123.0, 126.4 (2 C), 130.2 (2 C), 137.9, 139.4, 142.6, 146.6. **IR** (KBr): 2952, 2930, 2859, 1631, 1593, 1493, 1455, 1378, 1306, 1182, 1082, 1044, 1012, 896, 872, 819 cm1. **MS** (ES): 633 [2M+1]+, 317 [M+1]+ (100%). **Anal. calcd for** C19H24SO2: C, 72.11; H, 7.64; S, 10.13. **Found**: C,72.30; H, 7.93; S, 10.41.

Data of **4a**: ***Rf*** = 0.27 (50% EtOAc-hexane). **[]20D** = 11.4 (*c* = 1.19). **1H NMR (300 MHz)**  0.80 (t, 3 H, *J* = 7.0 Hz, Me-*n*-Bu), 1.11-1.25 (m, 4 H, 2 CH2-*n*- Bu), 1.62-1.75 (m, 2 H, CH2-*n*-Bu), 2.39 (s, 3 H, Me-*p*-Tol), 3.05 (m, 1 H, H-6), 3.28 (m, 1 H, H-3a), 3.33 (dd, 1 H, *J* = 10.9, 6.6 Hz, 1 H-3), 4.21-4.27 (m, 2 H, 1 H-3, 1 H-1), 4.35 (dm, 1 H, *J* = 12.0 Hz, 1 H-1), 5.37 (m, 1 H, H-7), 6.63 (t, 1 H, *J* = 2.4 Hz, H-4), 7.29 (d, 2 H, *J* = 7.9 Hz, *p*-Tol), 7.48 (d, 2 H, *J* = 8.3 Hz, *p*-Tol). **13C NMR (50 MHz)**  13.9 (Me-*n*-Bu), 21.3 (Me-*p*-Tol), 22.6, 27.6, 31.9, 36.6, 41.2, 69.0, 70.8, 120.2, 125.3 (2 C), 129.8 (2 C), 131.5, 136.1, 138.7, 141.2, 148.3. **IR** (film): 3369, 2956, 2926, 2857, 1651, 1456, 1260, 1084, 1048, 898, 809 cm1. **MS** (ES): 633 [2M+1]+ (100%), 317 [M+1]+.

**1.2. Synthesis of ()-4-Oxa-9-phenyl-8-(*p*-tolylsulfinyl)-6-(*E*)-8-(*Z*)-nonadien-1-yne, 2b, ()-(3a*R*,6*S*,*SS*)-6-Phenyl-5-(*p*-tolylsulfinyl)-1,3,3a,6-tetrahydroisobenzofuran, 3b, and ()-(3a*S*,6*R*,*SS*)-6-Phenyl-5-(*p*-tolylsulfinyl)-1,3,3a,6-tetrahydroisobenzofuran, 4b.**

From ()-2(*E*)-4-(*Z*)-4-(*p*-Tolylsulfinyl)penta-2,4-dien-1-ol (298 mg, 1 mmol), **1b**, propargyl bromide (0.32 mL, 446 mg, 3 mmol), Triton B (0.10 mL, 91 mg, 0.2 mmol) and 60% aqueous sodium hydroxide (10 mL) following the general procedure (2 h) compound **2b** was obtained. The 1H NMR spectra of the crude product run after the work-up procedure showed a 30:65:5 mixture of **2b**, **3b** and **4b** with traces of **2b'**. After 2 days at room temperature the cycloaddition was complete and a 92:8 mixture of **3b** and **4b** was obtained. Purification by chromatography (20-80% EtOAc-hexane) afforded 14 mg of a 1:1 mixture of ()-4-Oxo-8-(*p*-tolylsulfinyl)-6-(*E*)-8-(*E*)-nonadien-1-yne (2%), **2b'**, and the aromatized derivative **6b** (2%), 218 mg (0.65 mmol, 65%) of **3b** as a white solid that was recrystallized from EtOAc-hexane, 19 mg (0.05 mmol, 5%) of **4b** and 7 mg (0.02 mmol, 2%) of starting material **1b**.

Data of **2b**: ***Rf*** = 0.37 (50% EtOAc-hexane). **1H NMR (300 MHz)**  2.36 (s, 3 H, Me-*p*-Tol), 3.94 (m, 2 H, 2 H-3), 4.04 (td, 2 H, *J* = 4.3, 1.2 Hz, 2 H-5), 6.17 (dt, 1 H, *J* = 15.9, 5.6 Hz, H-6), 6.31 (dd, 1 H, *J* = 15.9, 1.0 Hz, H-7), 7.23-7.29 (m, 4 H), 7.35-7.42 (m, 4 H), 7.48-7.51 (m, 2 H).

Data of **2b'**: ***Rf*** = 0.37 (50% EtOAc-hexane). **1H NMR (300 MHz)**  2.36 (s, 3 H, Me-*p*-Tol), 3.87 (d, 2 H, *J* = 2.4 Hz, 2 H-3), 3.96 (d, 2 H, *J* = 6.0 Hz, 2 H-5), 6.07 (dt, 1 H, *J* =16.3, 5.8 Hz, H-6), 6.43 (d, 1 H, *J* = 16.5 Hz, H-7), 7.31-7.47 (m, 8 H), 7.55 (d, 2 H, *J* = 8.2 Hz).

Data of **3b**: **mp**: 164 ºC. ***Rf*** = 0.11 (50% EtOAc-hexane). **1H NMR (300 MHz)**  2.39 (s, 3 H, Me-*p*-Tol), 3.41 (m, 1 H, H-3a), 3.47 (ddd, 1 H, *J* = 11.0, 7.03, 0.7 Hz, 1 H-3), 3.56 (m, 1 H, H-6), 4.26 (dm, 1 H, *J* = 11.7 Hz, 1 H-1), 4.37-4.43 (m, 2 H, 1 H-3, 1 H-1), 5.34 (t, 1 H, *J* = 2.0 Hz, H-7), 6.92-6.96 (m, 2 H), 6.99 (t, 1 H, *J* = 2.2 Hz, H-4), 7.22-7.33 (m, 7 H). **13C NMR (75 MHz)**  21.5 (Me-*p*-Tol), 40.8, 43.4, 68.9, 71.5, 119.6, 122.9, 126.9 (2 C), 127.6, 128.8 (2 C), 129.1 (2 C), 130.0 (2 C), 136.6, 138.9, 140.5, 142.6, 147.4. **IR** (KBr): 3026, 2922, 2859, 1629, 1595, 1493, 1452, 1328, 1306, 1182, 1082, 1047, 1014, 959, 896, 851, 813, 763, 700 cm1. **MS** (ES): 695 [2M+Na]+ (100%), 673 [2M+1]+, 659 [M+Na]+, 337 [M+1]+. **Anal. calcd for** C21H20SO2: C, 74.97; H, 5.99; S, 9.53. **Found**: C, 74.68; H, 6.10; S, 9.42.

Data of **4b**: **mp**: 175-177 ºC. ***Rf*** = 0.20 (50% EtOAc-hexane). **1H NMR (300 MHz)**  2.31 (s, 3 H, Me-*p*-Tol), 3.40-3.48 (m, 2 H, H-3a, 1 H-3), 4.26-4.35 (m, 2 H, 1 H-1, 1 H-6), 4.39-4.47 (m, 2 H, 1 H-1, 1 H-3), 5.46 (br s, 1 H, H-7), 6.70 (t, 1 H, *J* = 2.3 Hz, H-4), 6.90-6.94 (m, 2 H), 6.97-7.15 (m, 7 H). **13C NMR (75 MHz)**  21.3 (Me-*p*-Tol), 40.8, 43.9, 69.0, 71.3, 119.5, 125.6 (2 C), 125.9, 127.3, 128.4 (2 C), 129.4 (2 C), 129.5 (2 C), 136.9, 139.6, 139.9, 141.2, 148.6. **IR** (KBr): 3026, 2922, 2859, 1595, 1493, 1452, 1306, 1082, 1047, 1014, 959, 896, 813, 763, 700 cm1. **MS** (ES): 359 [M+Na]+, 337 [M+1]+ (100%). **Anal. calcd for** C21H20SO2: C, 74.97; H, 5.99; S, 9.53. **Found**: C, 74.80; H, 6.04; S, 9.42.

**1.3. Synthesis of (±)-*N*-[5-Phenyl-4-(*p*-tolylsulfinyl)penta-2-(*E*)-4-(*Z*)-dienyl]-*N*-prop-2-ynyl-*p*-tolylsulfonamide, 2c, ()-(3a*R*,6*S*,*SS*)-6-Phenyl-5-(*p*-tolylsulfinyl)-2-(*p*-tolylsulfonyl)-2,3,3a,6-tetrahydroisoindole, 3c, and ()-(3a*S*,6*R*,*SS*)-6-Phenyl-5-(*p*-tolylsulfinyl)-2-(*p*-tolylsulfonyl)-2,3,3a,6-tetrahydroisoindole, 4c.**

From dienol **1b** (60 mg, 0.2 mmol), Ph3P (79 mg, 0.3 mmol), *N*-(Prop-2-ynyl)-*p*-tolylsulfonamide2 (63 mg, 0.3 mmol), diisopropyl azodicarboxylate (60 L, 61 mg, 0.3 mmol) following the general procedure (THF, 0 ºC, 1 h 30 min) compound **2c** was obtained. Purification by chromatography (20-50% EtOAc-hexane) afforded 95 mg (0.19 mmol, 95%) of a 72:28 mixture of **2c** and **3c** with traces of **4c**.

A solution of this mixture in CDCl3 was cooled at 5 ºC and monitored by 1H NMR until cycloaddition was complete (3 days), affording a 94:6 mixture of **3c** and **4c**. Purification by chromatography (20-50% EtOAc-hexane) afforded 89 mg (0.18 mmol, 90%) of **3c** as white solid that was recrystallized from EtOAc-hexane and 5 mg (0.01 mmol, 5%) of **4c** as a white solid that was recrystallized from EtOAc-hexane.

When the amino-Mitsunobu reaction was carried out at room temperature **2c** was not detected and a mixture of **3c** and **4c** was obtained after chromatography in an identical diastereomeric ratio to that described above.

Partial data of **2c**: ***Rf*** = 0.12 (30% EtOAc-hexane). **1H NMR (300 MHz)**  2.35 (s, 3 H, Me-*p*-Tol), 2.38 (s, 3 H, Me-*p*-Tol), 3.50-3.90 (m, 4 H, 2 H-3, 2 H-5), 5.97 (dt, 1 H, *J* = 15.6, 6.8 Hz, H-6), 6.30 (dd, 1 H, *J* = 15.7, 0.9 Hz, H-7).

Data of **3c**: **mp**: 97-98 ºC. ***Rf*** = 0.19 (50% EtOAc-hexane). **1H NMR (300 MHz)-COSY**  2.37 (s, 3 H, Me-*p*-Tol), 2.43 (s, 3 H, Me-*p*-Tol), 2.89 (dd, 1 H, *J* = 11.2, 9.3 Hz, 1 H-3), 3.23 (m, 1 H, H-3a), 3.44 (m, 1 H, H-6), 3.76 (dd, 1 H, *J* = 13.4, 1.2 Hz, 1 H-1), 4.00 (m, 1 H, H-1), 4.04 (dd, 1 H, *J* = 9.0, 8.3 Hz, H-3), 5.29 (t, 1 H, *J* = 1.8 Hz, H-7), 6.76-6.82 (m, 2 H), 6.87 (t, 1 H, *J* = 2.4 Hz, H-4), 7.20-7.27 (m, 7 H), 7.32 (m, 2 H), 7.71 (d, 2 H, *J* = 8.3 Hz). **13C NMR (50 MHz)**  21.5 (2 C, 2 Me-*p*-Tol), 39.2 (C-3a), 42.8 (C-6), 50.3 (C-1), 52.2 (C-3), 121.7, 122.5, 126.7 (2 C), 127.5 (2 C), 127.7, 128.7 (2 C), 128.9 (2 C), 129.8 (2 C), 130.0 (2 C), 132.9, 133.7, 138.5, 139.8, 142.7, 143.7, 147.2. **IR** (KBr): 1630, 1492, 1453, 1346, 1163, 1095, 1051, 811, 703 cm1. **MS** (ES): 979 [2M+1]+, 490 [M+1]+ (100%). **Anal. calcd for** C28H27NO3S2: C, 68.68; H, 5.56; N, 2.86; S, 13.10. **Found**: C, 68.57; H, 5.35; N, 2.82; S, 13.42.

Data of **4c**: **mp**: 140-142 ºC. ***Rf*** = 0.14 (50% EtOAc-hexane). **1H NMR (300 MHz)**  2.29 (s, 3 H, Me-*p*-Tol), 2.42 (s, 3 H, Me-*p*-Tol), 2.86 (dd, 1 H, *J* = 11.2, 9.3 Hz, 1 H-3), 3.15 (m, 1 H, H-3a), 3.83 (dd, 1 H, *J* = 14.2, 1.0 Hz, 1 H-1), 3.95 (t, 1 H, *J* = 8.5 Hz, 1 H-3), 3.97 (m, 1 H, 1 H-1), 4.29 (m, 1 H, H-6), 5.40 (br s, 1 H, H-7), 6.53 (t, 1 H, *J* = 2.6 Hz, H-4), 6.73-6.80 (m, 2 H), 6.93-7.12 (m, 7 H), 7.31 (d, 2 H, *J* = 8.1 Hz), 7.70 (d, 2 H, *J* = 8.1 Hz). **13C NMR (75 MHz)**  21.4 (Me-*p*-Tol), 21.6 (Me-*p*-Tol), 39.1 (C-3a), 43.4 (C-6), 50.4 (C-1), 52.1 (C-3), 121.7, 125.5 (2 C), 125.6, 127.4, 127.5 (2 C), 128.4 (2 C), 129.2 (2 C), 129.5 (2 C), 129.9 (2 C), 133.1, 134.0, 139.3, 141.4, 143.8 (2 C), 148.6. **IR** (KBr): 1631, 1493, 1453, 1344, 1155, 1091, 1038, 805, 756, 701, 667 cm1. **MS** (ES): 490 [M+1]+.

**1.4. Synthesis of ()-(3a*R*,6*S*,*SS*)-2,2-Bis-benzenesulfonyl-6-phenyl-5-(*p*-tolylsulfinyl)-2,3,3a,6 tetrahydro-1*H*-indene, 3d, and ()-(3a*S*,6*R*,*SS*)-2,2-Bis-benzenesulfonyl-6-phenyl-5-(*p*-tolylsulfinyl)-2,3,3a,6 tetrahydro-1*H*-indene, 4d.**

From dienol **1b** (49 mg, 0.16 mmol), Ph3P (63 mg, 0.24 mmol), 4,4-Bis-benzenesulfonyl-but-1-yne2 (60 mg, 0.18 mmol) and diisopropyl azodicarboxylate (50 L, 49 mg, 0.24 mmol) following the general procedure (C6H6, rt, 1 h 30 min) a 98:2 mixture of **3d** and **4d** was obtained. Dienyne **2d** was not detected in the 1H NMR spectra of the crude product. Purification by chromatography (20-50% EtOAc-hexane) afforded 90 mg (0.146 mmol, 90%) of **3d** as a white solid that was recrystallized from EtOAc-hexane and 2 mg (0.003 mmol, 2%) of **4d** as a white solid.

Data of **3d**: **mp**: 229-230 ºC. ***Rf*** = 0.45 (80% EtOAc-hexane). **1H NMR (300 MHz)**  2.37-2.42 (m, 1 H), 2.40 (s, 3 H, Me-*p*-Tol), 3.08 (t, 1 H, *J* = 7.3 Hz), 3.16 (d, 1 H, *J* = 18.6 Hz), 3.37 (m, 1 H), 3.41-3.54 (m, 2 H), 5.23 (br s, 1 H, H-7), 6.78-6.82 (m, 2 H), 6.93 (br s, 1 H, H-4), 7.24-7.35 (m, 6 H), 7.54-7.78 (m, 7 H), 7.99 (m, 2 H), 8.13 (m, 2 H). **13C NMR (50 MHz)**  21.5 (Me-*p*-Tol), 35.7, 37.3, 39.7, 42.9, 89.9, 121.7, 124.2, 126.9 (2 C), 127.6, 128.7 (2 C), 128.8 (2 C), 128.9 (2 C), 129.0 (2 C), 130.0 (2 C), 131.3 (2 C), 131.5 (2 C), 134.1, 134.7, 134.9, 135.8, 135.9, 138.6, 140.0, 142.7, 145.6. **IR** (KBr): 3060, 3021, 2917, 2840, 1631, 1491, 1448, 1323, 1312, 1143, 1077, 1051, 757, 733, 703 cm1. **MS** (ES): 615 [M+1]+ (100%). **Anal. calcd for** C34H30O5S3: C, 66.42; H, 4.92; S, 15.65. **Found**: C, 66.33; H, 5.08; S, 15.43.

Data of **4d**: **mp**: 114-115 ºC. ***Rf*** = 0.41 (80% EtOAc-hexane). **1H NMR (300 MHz)**  2.32 (s, 3 H, Me-*p*-Tol), 2.36 (m, 1 H), 2.98 (dd, 1 H, *J* = 14.4, 8.1 Hz), 3.14 (d, 1 H, *J* = 9.4 Hz), 3.23-3.47 (m, 2 H), 4.28 (m, 1 H), 5.35 (br s, 1 H, H-7), 6.59 (t, 1 H, *J* = 2.6 Hz, H-4), 6.83 (dd, 1 H, *J* = 8.1, 1.7 Hz), 6.98-7.11 (m, 7 H), 7.50-7.77 (m, 6 H), 8.00 (dd, 2 H, *J* = 8.5, 1.2 Hz), 8.09 (dd, 2 H, *J* = 8.5, 1.2 Hz). **13C NMR (50 MHz)**  21.4 (Me-*p*-Tol), 36.2, 36.8, 39.4, 43.6, 90.0 (C-2), 122.0, 125.5 (2 C), 127.3, 127.8, 128.4 (2 C), 128.9 (2 C), 129.0 (2 C), 129.4 (2 C), 129.5 (2 C), 131.3 (2 C), 131.4 (2 C), 134.2, 134.7, 135.0, 136.1, 139.5, 139.6, 140.8, 141.3, 147.2, 153.1. **IR** (KBr): 3060, 2924, 2851, 1631, 1492, 1447, 1331, 1312, 1146, 1078, 1042, 809, 757, 730 cm1. **MS** (ES): 615 [M+1]+ (100%).

**1.5. Synthesis of ()-5,5-Bis-benzenesulfonyl-10-phenyl-9-(*p*-tolylsulfinyl)-7-(*E*)-9-(*Z*)-decadien-1-yne, 2e, ()-(4a*R*,7*S*,*SS*)-3,3-Bis-benzenesulfonyl-7-phenyl-6-(*p*-tolylsulfinyl)-1,2,3,4,4a,7-hexahydronaphthalene, 3e, and ()-(4a*S*,7*R*,*SS*)-3,3-Bis-benzenesulfonyl-7-phenyl-6-(*p*-tolylsulfinyl)-1,2,3,4,4a,7-hexahydronaphthalene, 4e.**

From dienol **1b** (39 mg, 0.13 mmol), Ph3P (52 mg, 0.20 mmol), 5,5-Bis-benzenesulfonyl-pent-1-yne (50 mg, 0.14 mmol) and diisopropyl azodicarboxylate (40 L, 40 mg, 0.20 mmol) following the general procedure (C6H6, rt, 1 h) compound **2e** was obtained. Purification by chromatography (10-50% EtOAc-hexane) afforded 70 mg of impure **2e**. A second chromatography (5-50% EtOAc-CH2Cl2) afforded 30 mg (0.05 mmol, 38%) of **2e** as a colorless oil.

Data of **2e**: **mp**: 84-85 ºC. ***Rf*** = 0.18 (60% Et2O-hexane). **1H NMR (300 MHz)**  1.97 (t, 1 H, *J* = 2.6 Hz, H-1), 2.24-2.48 (m, 4 H, 2 H-3, 2 H-4), 2.38 (s, 3 H, Me-*p*-Tol), 2.93 (d, 2 H, *J* = 6.6 Hz, 2 H-6), 6.17 (d, 1 H, *J* = 16.1 Hz, H-8), 6.39 (dt, 1 H, *J* = 15.7, 6.6 Hz, H-7), 7.21-7.75 (m, 15 H), 7.95-7.99 (m, 4 H). **13C NMR (75 MHz)**  13.5, 21.4 (Me-*p*-Tol), 28.8, 33.0, 69.5, 82.3, 89.5, 124.5 (2 C), 126.7, 127.1, 128.6 (2 C), 128.8 (4 C), 130.0 (2 C), 130.1 (2 C), 131.1 (4 C), 133.8, 134.7, 136.1, 136.3, 139.6, 140.9, 142.5. **IR** (KBr): 2917, 1631, 1447, 1310, 1144, 1079, 724 cm1. **MS** (ES): 629 [M+1]+ (100%).

From dienyne **2e** (30 mg, 0.05 mmol) following the general procedure for the thermal cycloaddition (80 ºC, 14 h) a 91:9 mixture of **3e** and **4e** was obtained. Purification by chromatography (2-5% EtOAc-CH2Cl2) afforded 18 mg (0.029 mmol, 58%) of **3e** with traces of **4e** as a white solid that was recrystallized from EtOAc-hexane and 10 mg (0.016, 32%) of a mixture of **3e** and **4e**.

Data of **3e**: **mp**: 223-225 ºC. ***Rf*** = 0.23 (10% EtOAc-CH2Cl2). **1H NMR (300 MHz)**  2.00-2.27 (m, 3 H), 2.40 (s, 3 H, Me-*p*-Tol), 2.58 (m, 1 H), 2.88-3.00 (m, 2 H), 3.45 (m, 1 H, H-7), 3.88 (m, 1 H, H-4a), 5.30 (t, 1 H, *J* = 1.7 Hz, H-8), 6.71 (dd, 1 H, *J* = 3.4, 1.2 Hz, H-5), 6.82-6.88 (m, 2 H), 7.20-7.29 (m, 5 H), 7.41 (d, 2 H, *J* = 8.3 Hz), 7.58-7.68 (m, 4 H), 7.71-7.79 (m, 2 H), 7.96 (d, 2 H, *J* = 8.3 Hz), 8.14 (d, 2 H, *J* = 8.1 Hz). **13C NMR (50 MHz)**  21.5 (Me-*p*-Tol), 27.9, 29.7, 33.9, 34.6, 42.3, 87.5 (C-3), 122.7, 126.5, 126.6 (2 C), 127.4, 128.4 (2 C), 128.8 (2 C), 128.9 (2 C), 130.1 (2 C), 131.1 (2 C), 131.5 (2 C), 132.1, 134.6, 134.8, 135.7, 136.6, 138.8, 140.5, 142.7, 144.6. **IR** (KBr): 3060, 2921, 2851, 1633, 1491, 1447, 1376, 1325, 1310, 1146, 1080, 1049, 810, 756, 724, 704, 687 cm1. **MS** (ES): 629 [M+1]+ (100%). **Anal. calcd for** C35H32O5S3: C, 66.85; H, 5.13; S, 15.30. **Found**: C, 67.02; H, 5.40; S, 15.14.

Partial data of **4e** from the mixture: ***Rf*** = 0.21 (10% EtOAc-CH2Cl2). **1H NMR (300 MHz)**  2.33 (s, 3 H, Me-*p*-Tol), 3.85 (m, 1 H, H-4a), 4.19 (m, 1 H, H-7), 5.37 (m, 1 H, H-8), 6.46 (d, 1 H, *J* = 3.8 Hz, H-5).

**1.6. Synthesis of ()-2-(*E*)-4(*Z*)-5-Phenyl-4-(*p*-tolylsulfinyl)penta-2,4-dienyl propiolate, 2f, ()-(3a*R*,6*S*,*SS*)-6-Phenyl-5-(*p*-tolylsulfinyl)-3a,6-dihydro-3H-isobenzofuran-1-one, 3f, ()-(3a*S*,6*R*,*SS*)-6-Phenyl-5-(*p*-tolylsulfinyl)-3a,6-dihydro-3H-isobenzofuran-1-one, 4f.**

To solution of ()-2-(*E*)-4-(*Z*)-5-Phenyl-4-(*p*-tolylsulfinyl)penta-2,4-dien-1-ol (120 mg, 0.40 mmol), **1b**, and propiolic acid (37 L, 42 mg, 0.60 mmol) in 4 mL of CH2Cl2, at 0 ºC, dicyclohexylcarbodiimide (124 mg, 0.6 mmol) and dimethylaminopyridine (20 mg, 0.16 mmol) were added. The mixture was allowed to warm to room temperature and monitored by TLC until starting material disappearance (1 h). The reaction mixture was filtered to remove dicyclohexylurea and the ester was purified by chromatography (20% EtOAc-hexane) affording 83 mg (0.28 mmol, 70%) of **2f** as a colorless oil that cyclized slowly upon standing.

Data of **2f**: ***Rf*** = 0.41 (50% EtOAc-hexane). **1H NMR (300 MHz)**  2.38 (s, 3 H, Me-*p*-Tol), 2.87 (s, 1 H, H-3'), 4.66 (d, 2 H, *J* = 7.3 Hz, H-1), 6.25 (dt, 1 H, *J* = 15.9, 6.0 Hz, H-2), 6.38 (dq, 1 H, *J* = 15.6, 1.0 Hz, H-3), 7.25-7.28 (m, 3 H), 7.38-7.44 (m, 5 H), 7.51-7.54 (m, 2 H). **13C NMR (50 MHz)**  21.3 (Me-*p*-Tol), 65.9 (C-1), 74.3, 75.1, 124.4 (2 C), 126.6, 127.2, 128.6 (2 C), 129.3, 129.9 (2 C), 130.0 (2 C), 133.7, 136.6, 139.3, 141.0, 142.2, 152.2.

From dienyne **2f** (62 mg, 0.17 mmol) following the general procedure for the thermal cycloaddition (80 ºC, 8 h) an 84:16 mixture of **3f** and **4f** was obtained. Purification by chromatography (5-20% EtOAc-CH2Cl2) afforded 45 mg (0.12 mmol, 72%) of **3f** as a white solid that was recrystallized from EtOAc-hexane and 9 mg (0.025, 14%) of impure **4f** as a white solid that was recrystallized from Et2O.

Data of **3f**: **mp**: 208-210 ºC. ***Rf*** = 0.26 (80% EtOAc-hexane). **1H NMR (300 MHz)**  2.41 (s, 3 H, Me-*p*-Tol), 3.71 (dt, 1 H, *J* = 11.7, 2.2 Hz, H-6), 3.84 (m, 1 H, H-3a), 4.06 (dd, 1 H, *J* = 10.1, 8.2 Hz, 1 H-3), 4.84 (t, 1 H, *J* = 8.4 Hz, 1 H-3), 6.55 (t, 1 H, *J* = 2.4 Hz, H-7), 6.91-6.94 (m, 2 H), 7.03 (t, 1 H, *J* = 2.3 Hz, H-4), 7.27 (m, 4 H), 7.32-7.35 (m, 3 H). **13C NMR (50 MHz)**  21.6 (Me-*p*-Tol), 38.4, 43.9, 70.1 (C-3), 122.2, 126.2, 126.8 (2 C), 128.4, 129.1 (2 C), 129.2 (2 C), 130.2 (2 C), 135.7, 137.9, 138.0, 143.1, 148.3, 168.3. **IR** (KBr): 3027, 2912, 1760, 1693, 1627, 1492, 1454, 1333, 1205, 1182, 1085, 1048, 1021, 974, 897, 809, 757, 739, 701 cm1. **MS** (ES): 373 [M+Na]+, 351 [M+1]+ (100%). **Anal. calcd for** C21H18O3S: C, 71.98; H, 5.18; S, 9.15. **Found**: C, 72.12; H, 5.35; S, 9.32.

Data of **4f**: **mp**: 202-204 ºC. ***Rf*** = 0.21 (80% EtOAc-hexane). **1H NMR (300 MHz)**  2.31 (s, 3 H, Me-*p*-Tol), 3.86 (m, 1 H, H-3a), 3.99 (dd, 1 H, *J* = 10.3, 8.1 Hz, 1 H-3), 4.59 (dt, 1 H, *J* = 12.1, 2.3 Hz, H-6), 4.79 (t, 1 H, *J* = 8.7 Hz, 1 H-3), 6.70 (m, 1 H, H-7), 6.77 (t, 1 H, *J* = 2.6 Hz, H-4), 6.85-6.87 (m, 2 H), 6.93-7.19 (m, 7 H). **13C NMR (50 MHz)**  21.4 (Me-*p*-Tol), 38.3, 44.5, 69.9 (C-3), 124.9, 125.6 (2 C), 127.0, 128.0, 128.6, 128.7 (2 C), 129.4 (2 C), 129.7 (2 C), 135.8, 137.3, 139.2, 141.8, 149.3, 168.1. **IR** (KBr): 3038, 2917, 1753, 1626, 1454, 1178, 1080, 1045, 981, 807, 759, 702 cm1. **MS** (ES): 373 [M+Na]+, 351 [M+1]+ (100%).

**1.7. Synthesis of ()-5-Oxa-10-phenyl-9-(*p*-tolylsulfinyl)-7-(*E*)-9-(*Z*)-decadien-2-yne, 2g, ()-(3a*R*,6*S*,*SS*)-7-Methyl-6-phenyl-5-(*p*-tolylsulfinyl)-1,3,3a,6 tetrahydroisobenzofuran, 3g, and ()-(3a*S*,6*R*,*SS*)-7-Methyl-6-phenyl-5-(*p*-tolylsulfinyl)-1,3,3a,6-tetrahydroisobenzofuran, 4g.**

From dienol **1b** (90 mg, 0.3 mmol), 4-Bromo-but-2-yne (79 L, 120 mg, 0.9 mmol), Triton B (30 L, 8 mg, 0.06 mmol) and 60% aqueous sodium hydroxide (3 mL) following the general procedure (3 h) compound **2g** was obtained with traces of **2g'**. Purification by chromatography (20% EtOAc-hexane) afforded 2 mg (0.005 mmol, 2%) of **2g'** as a colorless oil and 91 mg (0.26 mmol, 87%) of **2g** as a colorless oil.

Data of **2g'**: ***Rf*** = 0.50 (50% EtOAc-hexane). **1H NMR (300 MHz)**  1.82 (t, 3 H, *J* = 2.3 Hz, Me-1), 2.36 (s, 3 H, Me-*p*-Tol), 3.93 (q, 2 H, *J* = 2.3 Hz, H-4), 4.04 (dt, 2 H, *J* = 5.7, 1.5 Hz, 2 H-6), 6.08 (dt, 1 H, *J* = 16.3, 5.7 Hz, H-7), 6.31 (dq, 1 H, *J* = 16.5, 1.4 Hz, H-8), 7.23 (d, 2 H, *J* = 7.9 Hz), 7.30-7.48 (m, 6 H), 7.56 (d, 2 H, *J* = 8.2 Hz).

Data of **2g**: ***Rf*** = 0.45 (50% EtOAc-hexane). **1H NMR (200 MHz)**  1.81 (t, 3 H, *J* = 2.3 Hz, Me-1), 2.36 (s, 3 H, Me-*p*-Tol), 3.90 (q, 2 H, *J* = 2.4 Hz, H-4), 4.01 (m, 2 H, 2 H-6), 6.18 (dt, 1 H, *J* = 15.7, 5.1 Hz, H-7), 6.31 (d, 1 H, *J* = 15.7 Hz, H-8), 7.22-7.26 (m, 3 H), 7.35-7.46 (m, 5 H), 7.47-7.52 (m, 2 H). **13C NMR (75 MHz)**  3.6 (C-1), 21.3 (Me-*p*-Tol), 57.5, 69.5, 74.8, 82.6, 124.3, 124.5 (2 C), 128.6 (2 C), 129.0, 129.9 (2 C), 130.0 (2 C), 131.2, 134.0, 135.6, 139.6, 140.8, 142.9. **IR** (film): 2922, 2852, 1595, 1491, 1445, 1355, 1261, 1137, 1080, 1045, 966, 924, 877, 808, 753, 695 cm1. **MS** (ES): 701 [2M+1]+ (100%), 351 [M+1]+.

From dienyne **2g** (90 mg, 0.26 mmol) following the general procedure for the thermal cycloaddition (90 ºC, 6 h) an 80:20 mixture of **3g** and **4g** was obtained. Purification by chromatography (10-80% EtOAc-CH2Cl2) afforded 40 mg of **3g** (0.11 mmol, 42%) as a white solid that was recrystallized from Et2O-hexane, and 34 mg (0.10 mmol, 38%) of a mixture of **4g** and the aromatized derivative **6g**.

Data of **3g**: **mp**: 76-78 ºC. ***Rf*** = 0.19 (50% EtOAc-hexane). **1H NMR (200 MHz)**  1.16 (s, 3 H, Me-7), 2.40 (s, 3 H, Me-*p*-Tol), 3.36-3.50 (m, 3 H, H-3a, 1 H-3, H-6), 4.30-4.40 (m, 3 H, 2 H-1, 1 H-3), 6.86-7.02 (m, 3 H), 7.23-7.36 (m, 7 H). **13C NMR (50 MHz)**  16.8 (Me-7), 21.3 (Me-*p*-Tol), 41.5, 47.2, 67.8, 71.5, 122.0, 123.8, 127.0 (2 C), 127.6, 128.6, 129.5 (2 C), 130.0, 131.5, 138.9, 139.2, 142.5, 147.5. **IR** (KBr): 2917, 2854, 1632, 1492, 1453, 1302, 1147, 1083, 1048, 899, 809, 771, 703 cm1. **MS** (ES): 701 [2M+1]+, 351 [M+1]+ (100%). **Anal. calcd for** C22H22O2S: C, 75.39; H, 6.33; S, 9.15. **Found**: C, 75.41; H, 6.65; S, 9.48.

Partial data of **4g** from the mixture: ***Rf*** = 0.19 (50% EtOAc-hexane). **1H NMR (300 MHz)**  1.25 (s, 3H, Me-7), 2.32 (s, 3 H, Me-*p*-Tol), 3.34-3.45 (m, 2 H), 4.25-4.39 (m, 4 H), 6.54 (dd, 1 H, *J* = 2.9, 1.9 Hz, H-5).

Data of **6g**: ***Rf*** = 0.38 (50% EtOAc-hexane). **1H NMR (300 MHz)**  1.88 (s, 3 H, Me-4), 2.29 (s, 3 H, Me-*p*-Tol), 5.10 (t, 2 H, *J* = 1.9 Hz), 5.21 (br s, 2 H), 6.50 (dm, 1 H, *J* = 7.8 Hz), 6.96 (d, 2 H, *J* = 8.1 Hz), 7.03 (d, 2 H, *J* = 8.1 Hz), 7.19 (tm, 1 H, *J* = 7.6 Hz), 7.32-7.38 (m, 2 H), 7.47 (tm, 1 H, *J* = 7.5 Hz), 7.88 (s, 1 H, H-7). **13C NMR (50 MHz)**  16.8, 21.5, 41.5, 47.2, 67.8, 71.5, 122.0, 123.8, 127.0 (2 C), 127.6, 128.6, 129.5 (2 C), 130.0, 131.5, 138.9, 139.2, 142.5, 147.5. **IR** (film): 3049, 2923, 2854, 1762, 1631, 1493, 1444, 1358, 1178, 1081, 1049, 808, 771, 703 cm1. **MS** (ES): 349 [M+1]+ (100%).

**1.8. Synthesis of (+)-4-Oxa-8-(*RS*)-(2-methoxy-1-naphthylsulfinyl)-6-(*E*)-8-(*Z*)-tridecadien-1-yne, 2h, (3a*R*,6*R*,*RS*)-6-*n*-Butyl-5-(2-methoxy-1-naphthylsulfinyl)-1,3,3a,6-tetrahydroisobenzofuran, 3h, and (3a*S*,6*S*,*RS*)-6-*n*-Butyl-5-(2-methoxy-1-naphthylsulfinyl)-1,3,3a,6-tetrahydroisobenzofuran, 4h.**

From (–)-2(*E*)-4-(*Z*)-4-(*RS*)-(2-Methoxy-1-naphthylsulfinyl)-nona-2,4-dien-1-ol (69 mg, 0.20 mmol), **1c**, propargyl bromide (65 L, 89 mg, 0.60 mmol), Triton B (20 L, 18 mg, 0.04 mmol) and 60% aqueous sodium hydroxide (2 mL) following the general procedure (2 h) compound **2h** was obtained. Purification by chromatography (20-80% EtOAc-hexane) afforded 43 mg (0.11 mmol, 55%) of **2h** and 20 mg (0.05 mmol, 25%) of mixture of **3h** and **4h**.

Data of **2h**: ***Rf*** = 0.54 (80% EtOAc-hexane). **1H NMR (300 MHz)**  0.78 (t, 3 H, *J* = 7.0 Hz, Me-*n*-Bu), 1.10-1.39 (m, 4 H, 2 CH2-*n*-Bu), 2.13 (m, 1 H, 1 H-10), 2.33 (t, 1 H, *J* = 2.4 Hz, H-1), 2.45 (m, 1 H, 1 H-10), 3.84 (d, 2 H, *J* = 2.4 Hz, 2 H-3), 3.99 (s, 3 H, O-Me), 4.00 (m, 2 H, 2 H-5), 5.89 (dt, 1 H, *J* = 15.6, 6.3 Hz, H-6), 6.08 (t, 1 H, *J* = 7.8 Hz, H-9), 6.68 (dd, 1 H, *J* = 15.6, 0.8 Hz, H-7), 7.20 (d, 1 H, *J* = 9.0 Hz, H-3'), 7.36 (ddd, 1 H, *J* = 8.3, 7.0, 1.3 Hz, H-6'), 7.52 (ddd, 1 H, *J* = 8.6, 6.9, 1.5 Hz, H-7'), 7.75 (d, 1 H, *J* = 8.2 Hz, H-5'), 7.90 (d, 1 H, *J* = 9.0 Hz, H-4'), 9.07 (d, 1 H, *J* = 9.5 Hz, H-8').

To a solution of **2h** (10 mg, 0.026 mmol) in 0.5 mL of CH2Cl2, under an argon atmosphere, ZnBr2 (40 mg, 0.180 mmol) was added and the mixture was stirred at room temperature until starting material disappearance (12 h). Then 5% aqueous NaHCO3 (2 mL), water (2 mL), and CH2Cl2 (2 mL) were added, the layers were separated and the aqueous phase was extracted twice with CH2Cl2. The combined organic extracts were washed with a saturated solution of NaCl, dried over MgSO4 and filtered to give, after evaporation of the solvents, an 80:20 mixture of **3h** and **4h**. Purification by chromatography (30-80% EtOAc-hexane) afforded 8 mg (0.021 mmol, 80%) of an inseparable mixture of **3h** and **4h** as a colorless oil.

In a related experiment a solution of **2h** in CDCl3 was kept at room temperature and monitored by 1H NMR until cycloaddition was complete (3 days). For an identical sample cooled at 5 ºC the reaction was complete in 7 days, and using CD3OD as solvent it took 5 days at room temperature. In all these experiments the diastereomeric ratio measured was identical to that described above.

Partial data of **3h** from the mixture: ***Rf*** = 0.12 (50% EtOAc-hexane). **1H NMR (300 MHz)**  4.00 (s, 3 H, O-Me), 5.29 (br s, 1 H, H-7), 6.98 (t, 1 H, *J* = 2.2 Hz, H-4), 8.63 (d, 1 H, *J* = 8.8 Hz, H-8'). **IR**: 2950, 2926, 2855, 1620, 1593, 1560, 1506, 1467, 1430, 1353, 1334, 1272, 1250, 1150, 1135, 1045, 897, 812, 773, 750, 709 cm1. **MS** (ES): 383 [M+1]+ (100%), 381 [(M2)+1]+.

Partial data of **4h** from the mixture: ***Rf*** = 0.12 (50% EtOAc-hexane). **1H NMR (300 MHz)**  3.96 (s, 3 H, O-Me), 5.47 (br s, 1 H, H-7), 6.62 (t, 1 H, *J* = 2.2 Hz, H-4), 8.71 (d, 1 H, *J* = 8.5 Hz, H-8').

**1.9. Synthesis of ()-(3a*S*,6*R*,*RS*)-6-*n*-Butyl-4-(2-methoxy-1-naphthylsulfinyl)-1,3,3a,6-tetrahydroisobenzofuran, 3i, and (±)-(3a*R*,6*S*,*RS*)-6-*n*-Butyl-4-(2-methoxy-1-naphthylsulfinyl)-1,3,3a,6-tetrahydroisobenzofuran, 4i.**

From ()-2-(*Z*)-4-(*E*)-3-(*RS*)-(2-Methoxy-1-naphthylsulfinyl)nona-2,4-dien-1-ol (25 mg, 0.072 mmol), **1d**, propargyl bromide (39 L, 54 mg, 0.36 mmol), Triton B (8 L, 7 mg, 0.04 mmol) and 60% aqueous sodium hydroxide (0.7 mL) following the general procedure (3 h) compound **2i** was obtained. The 1H NMR of the crude product, run immediately after work-up showed a 64:32:4 mixture of **2i**, **3i** and **4i**. After 1 day at room temperature the cycloaddition was complete and an 89:11 mixture of **3i** and **4i** was obtained. Purification by chromatography (20-40% EtOAc-hexane) afforded 18 mg (0.047 mmol, 65%) of **3i** as a white solid that was recrystallized in EtOAc-hexane and 3 mg (0.008, 11%) of **4i** as a white solid.

Data of **3i**: **mp**: 155-156 ºC. ***Rf*** = 0.46 (80% EtOAc-hexane). **1H NMR (300 MHz)**  0.92 (t, 3 H, *J* = 7.0 Hz, Me-*n*-Bu), 1.29-1.44 (m, 4 H, 2 CH2-*n*-Bu), 1.61-1.68 (m, 2 H, CH2-*n*-Bu), 2.51 (m, 1 H, H-3a), 3.05 (m, 1 H, H-6), 3.39 (dd, 1 H, *J* = 10.9, 7.7 Hz, 1 H-3), 3.97 (t, 1 H, *J* = 7.8 Hz, H-3), 4.00 (s, 3 H, O-Me), 4.17 (br s, 2 H, 2 H-1), 5.47 (br s, 1 H, H-7), 6.78 (m, 1 H, H-5), 7.25 (d, 1 H, *J* = 9.1 Hz, H-3'), 7.37 (ddd, 1 H, *J* = 8.1, 7.0, 1.1 Hz, H-6'), 7.49 (ddd, 1 H, *J* = 8.4, 7.0, 1.5 Hz, H-7'), 7.78 (d, 1 H, *J* = 8.1 Hz, H-5'), 7.96 (d, 1 H, *J* = 9.2 Hz, H-4'), 8.66 (d, 1 H, *J* = 8.5 Hz, H-8'). **13C NMR (50 MHz)**  14.0 (Me-*n*-Bu), 22.9, 28.6, 34.9, 38.1, 39.3, 56.9, 68.5, 70.7, 112.8, 118.8, 120.0, 122.6, 124.6, 124.7, 128.2, 128.8, 129.5, 132.2, 132.5, 135.3, 137.7, 138.1, 158.0. **IR** (KBr): 2958, 2932, 2856, 1620, 1592, 1505, 1458, 1432, 1336, 1273, 1250, 1150, 1047, 1027, 904, 879, 829, 777, 753 cm1. **MS** (ES): 383 [M+1]+ (100%). **Anal. calcd for** C23H26O3S: C, 72.22; H, 6.85; S, 8.38. **Found**: C, 72.68; H, 6.72; S, 8.45.

Data of **4i**: **mp**: 114-116 ºC. ***Rf*** = 0.43 (80% EtOAc-hexane). **1H NMR (300 MHz)**  0.91 (t, 3 H, *J* = 6.8 Hz, Me-*n*-Bu), 1.27-1.39 (m, 4 H, 2 CH2-*n*-Bu), 1.57-1.66 (m, 2 H, CH2-*n*-Bu), 2.33 (dd, 1 H, *J* = 10.7, 7.6 Hz, 1 H-3), 3.15 (m, 1 H, H-6), 3.36 (m, 1 H, H-3a), 3.49 (t, 1 H, *J* = 7.5 Hz, H-3), 4.00 (s, 3 H, O-Me), 4.03 (m, 1 H, 1 H-1), 4.22 (dm, 1 H, *J* = 12.0 Hz, 1 H-1), 5.43 (br s, 1 H, H-7), 6.75 (m, 1 H, H-5), 7.23 (d, 1 H, *J* = 9.3 Hz, H-3'), 7.36 (ddd, 1 H, *J* = 8.1, 6.8, 1.2 Hz, H-6'), 7.47 (ddd, 1 H, *J* = 8.3, 6.8, 1.5 Hz, H-7'), 7.76 (dd, 1 H, *J* = 6.6, 0.7 Hz, H-5'), 7.95 (d, 1 H, *J* = 9.0 Hz, H-4'), 8.69 (dd, 1 H, *J* = 8.5, 1.0 Hz, H-8'). **13C NMR (50 MHz)**  14.1 (Me-*n*-Bu), 22.9, 28.5, 35.0, 38.0, 38.9, 56.8, 68.3, 70.0, 112.8, 119.8, 123.1, 124.6, 128.0, 128.3, 128.8, 129.4, 132.5, 133.7, 135.2, 137.4, 138.6, 157.9. **IR** (KBr): 2927, 2856, 1621, 1593, 1506, 1465, 1431, 1335, 1272, 1250, 1151, 1034, 908, 813, 747 cm1. **MS** (ES): 421, 419 (100%), 383 [M+1]+ .

**2. General Procedure for Oxidation of Sulfoxides with MMPP.**

To a cold (0 ºC) solution of the sulfoxide in MeOH (10 mL/mmol) 1.5 equiv of magnesium monoperoxyphthalate hexahydrate (MMPP) was added. The mixture was allowed to warm to rt, monitored by TLC until completion and then quenched with a saturated solution of NaHCO3 (4 mL/mmol). After removal of MeOH under reduced pressure, the mixture was diluted with EtOAc (5 mL/mmol), the layers were separated and the aqueous phase was extracted with EtOAc (3 times, 4 mL/mmol). The combined organic layers were washed with a saturated solution of NaCl (1 mL/mmol), dried over MgSO4, filtered and concentrated under reduced pressure to give a crude product that was purified by chromatography on silica gel using the appropriate mixture of solvents.

**2.1. Synthesis of (3a*R**,6*R**)-6-*n*-Butyl-5-(*p*-tolylsulfonyl)-1,3,3a,6-tetrahydroisobenzofuran, 5a.**

From a 67:33 mixture of **3a** and **4a** (13 mg, 0.041 mmol) and MMPP (38 mg (80%), 0.061 mmol) following the general procedure (3 h) a (3a*R*, 6*R*) enantio-enriched sulfone **5a** was obtained. Sulfoxides **3a** and **4a** afforded enantiomeric sulfones as showed the 1H NMR of the crude product. Purification by chromatography (10-30% EtOAc-hexane) gave 13 mg (0.039 mmol, 95%) of **5a** as a colorless oil.

Data of **5a**: ***Rf*** = 0.20 (30% EtOAc-hexane). **1H NMR (300 MHz)**  0.72 (t, 3 H, *J* = 7.0 Hz, Me-*n*-Bu), 0.80-1.18 (m, 4 H, 2 CH2-*n*- Bu), 1.49-1.79 (m, 2 H, CH2-*n*-Bu), 2.42 (s, 3 H, Me-*p*-Tol), 3.27 (m, 1 H, H-6), 3.32-3.40 (m, 2 H, H-3a, 1 H-3), 4.22-4.27 (m, 2 H, 1 H-3, 1 H-1), 4.35 (m, 1 H, 1 H-1), 5.38 (br s, 1 H, H-7), 7.09 (t, 1 H, *J* = 2.2 Hz, H-4), 7.31 (d, 2 H, *J* = 7.8 Hz, *p*-Tol), 7.73 (d, 2 H, *J* = 8.3 Hz *p*-Tol). **13C NMR (50 MHz)**  13.9 (Me-*n*-Bu), 21.5 (Me-*p*-Tol), 22.6, 27.0, 32.2, 36.2, 41.3, 68.8, 70.05, 120.1, 128.0 (2 C), 129.7 (2 C), 135.1, 135.6, 137.3, 144.3. **IR** (film): 2956, 2928, 2870, 1766, 1597, 1494, 1464, 1402, 1380, 1302, 1151, 1086, 1047, 1017, 902, 845, 814, 709 cm1. **MS** (ES): 331 [(M2)+1]+ (100%).

**2.2. Synthesis of ()-(3a*R*,6*S*)-6-Phenyl-5-(*p*-tolylsulfonyl)-1,3,3a,6-tetrahydroisobenzofuran, 5b.**

From a 75:25 mixture of **3b** and **4b** (19 mg, 0.056 mmol) and MMPP (52 mg (80%), 0.084 mmol) following the general procedure (4 h) racemic sulfone **5b** was obtained. Purification by chromatography (10-30% EtOAc-hexane) afforded 16 mg (0.045 mmol, 80%) of **5b** as a white solid that was recrystallized from EtOAc-hexane.

Data of **5b**: **mp**: 145-147 ºC. ***Rf*** = 0.41 (50% EtOAc-hexane). **1H NMR (300 MHz)**  2.28 (s, 3 H, Me-*p*-Tol), 3.41-3.57 (m, 2 H, H-3a, 1 H-3), 4.24 (d, 1 H, *J* = 11.5 Hz, 1 H-1), 4.36-4.43 (m, 2 H, 1 H-3, 1 H-1), 4.50 (m, 1 H, H-6), 5.38 (t, 1 H, *J* = 1.9 Hz, H-7), 6.83-7.14 (m, 9 H), 7.34 (t, 1 H, *J* = 2.4 Hz, H-4). **13C NMR (75 MHz)**  21.4 (Me-*p*-Tol), 41.2, 43.3, 68.8, 70.8, 120.1, 126.9, 127.3 (2 C), 128.1 (2 C), 129.0 (2 C), 129.5 (2 C), 134.2, 134.6, 137.6, 139.9, 142.9, 144.6. **IR** (KBr): 3060, 3027, 2857, 1626, 1492, 1453, 1310, 1153, 1076, 1043, 1016, 812, 766, 700 cm1. **MS** (ES): 370 [M+NH4]+ (100%), 353 [M+1]+.

**2.3. Synthesis of ()-(3a*R*,6*S*)-6-Phenyl-2,5-bis-(*p*-tolylsulfonyl)-2,3,3a,6-tetrahydroisoindole, 5c.**

From a 58:42 mixture of **3c** and **4c** (10 mg, 0.020 mmol) and MMPP (18 mg (80%), 0.03 mmol) following the general procedure racemic sulfone **5c** was obtained. Purification by chromatography (20-30% EtOAc-hexane) afforded 8 mg (0.016 mmol, 79%) of **5c** as a white solid that was recrystallized from EtOAc-hexane.

Data of **5c**: **mp**: 183-185 ºC. ***Rf*** = 0.43 (50% EtOAc-hexane). **1H NMR (300 MHz)**  2.28 (s, 3 H, Me-*p*-Tol), 2.42 (s, 3 H, Me-*p*-Tol), 2.25 (dd, 1 H, *J* = 11.2, 9.3 Hz, 1 H-3), 3.23 (m, 1 H, H-3a), 3.80 (dd, 1 H, *J* = 13.2, 1.2 Hz, 1 H-1), 3.95 (m, 1 H, 1 H-1), 4.00 (dd, 1 H, *J* = 9.0, 8.1 Hz, 1 H-3), 4.39 (dm, 1 H, *J* = 13.2 Hz, H-6), 5.35 (t, 1 H, *J* = 1.7 Hz, H-7), 6.69 (m, 2 H), 6.88-6.94 (m, 4 H), 6.98-7.06 (m, 3 H), 7.21 (dd, 1 H, *J* = 3.3, 1.8 Hz, H-4), 7.32 (m, 2 H), 7.71 (d, 2 H, *J* = 8.1 Hz). **13C NMR (50 MHz)**  21.4 (Me-*p*-Tol), 21.6 (Me-*p*-Tol), 39.5 (C-3a), 42.8 (C-6), 50.2 (C-1), 51.8 (C-3), 122.2, 127.0, 127.3 (2 C), 127.4 (2 C), 128.2 (2 C), 129.1 (2 C), 129.3 (2 C), 129.9 (2 C), 130.7, 134.1 (2 C), 137.2, 139.2, 143.2, 143.9, 144.6. **IR** (KBr): 3054, 2923, 2862, 1629, 1599, 1492, 1454, 1349, 1303, 1157, 1092, 1042, 984, 809, 763, 702, 683, 667 cm1. **MS** (ES): 506 [M+1]+ (100%). **Anal. calcd for** C28H27NO4S2: C, 66.51; H, 5.38; N, 2.77; S, 12.68. **Found**: C, 66.80; H, 5.35; N, 2.39; S, 12.57.

**2.4. Synthesis of ()-(4a*R*,7*S*)-3,3-Bis-benzenesulfonyl-7-phenyl-6-(*p*-tolylsulfonyl)-1,2,3,4,4a,7-hexahydronaphthalene, 5e.**

From a 74:26 mixture of **3e** and **4e** (10 mg, 0.016 mmol) and MMPP (15 mg (80%), 0.024 mmol) following the general procedure (3 h) racemic sulfone **5e** was obtained. Purification by chromatography (20-30% EtOAc-hexane) afforded 8 mg (0.012 mmol, 75%) of **5e** as white solid that was recrystallized from EtOAc-hexane.

Data of **5e**: **mp**: 239-241 ºC. ***Rf*** = 0.14 (30% EtOAc-hexane). **1H NMR (300 MHz)**  2.22 (m, 3 H), 2.31 (s, 3 H, Me-*p*-Tol), 2.52 (dm, 1 H, *J* = 14.0 Hz), 2.77 (ddd, 1 H, *J* = 14.5, 4.2, 2.1 Hz), 2.95 (m, 1 H), 3.90 (m, 1 H, H-4a), 4.35 (m, 1 H), 5.39 (m, 1 H), 6.76-6.79 (m, 2 H), 6.95-7.07 (m, 6 H), 7.19 (d, 2 H, *J* = 8.4 Hz), 7.58 (m, 2 H), 7.65-7.82 (m, 4 H), 7.94 (m, 2 H), 8.14 (m, 2 H). **13C NMR (75 MHz)**  21.4 (Me-*p*-Tol), 28.1, 29.5, 33.3, 34.2, 42.4, 87.3 (C-3), 123.5, 126.8, 127.6 (2 C), 128.4 (2 C), 128.7 (2 C), 128.8 (2 C), 128.9 (2 C), 129.2 (2 C), 130.2, 131.1 (2 C), 131.5 (2 C), 134.7, 135.0, 135.6, 136.2, 137.1, 138.0, 139.6, 142.4, 143.4, 146.2. **IR** (KBr): 3071, 3021, 2925, 2851, 1638, 1447, 1312, 1148, 1080, 993, 812, 755, 725 cm1. **MS** (ES): 667 [M+Na]+, 662 [M+NH4]+ (100%), 645 [M+1]+.

**2.5. Synthesis of ()-(3a*R*,6*S*)-7-Methyl-6-phenyl-5-(*p*-tolylsulfonyl)-1,3,3a,6-tetrahydroisobenzofuran, 5g.**

From a 65:35 mixture of **3g** and **4g** (53 mg, 0.15 mmol) and MMPP (139 mg (80%), 0.22 mmol) following the general procedure (3 h) racemic sulfone **5g** was obtained. Purification by chromatography (10-30% EtOAc-hexane) afforded 40 mg (0.11 mmol, 73%) of **5g** as a white solid that was recrystallized from EtOAc-hexane.

Data of **5g**: **mp**: 179-181 ºC. ***Rf*** = 0.19 (50% EtOAc-hexane). **1H NMR (300 MHz)**  1.20 (s, 3 H, Me-7), 2.27 (s, 3 H, Me-*p*-Tol), 3.41 (dd, 1 H, *J* = 11.2, 6.6 Hz, 1 H-3), 3.49 (m, 1 H, H-3a), 4.31-4.40 (m, 4 H, 2 H-1, 1 H-3, H-6), 6.88-7.04 (m, 7 H), 7.07 (d, 2 H, *J* = 8.3 Hz), 7.30 (dd, 1 H, *J* = 3.0, 1.6 Hz, H-4). **13C NMR (75 MHz)**  17.0 (Me-7), 21.4 (Me-*p*-Tol), 42.2, 47.3, 67.5, 70.9, 124.8, 126.9, 127.2 (2 C), 128.1, 129.0 (2 C), 129.4, 133.8, 137.9, 138.5, 142.8, 144.9. **IR** (KBr): 3067, 3025, 2919, 2867, 1594, 1444, 1312, 1299, 1193, 1143, 1112, 1084, 1056, 909, 900, 807 cm1. **MS** (ES): 367 [M+1]+ (100%).

**3. General procedure for Osmium-Catalyzed Dihydroxylation of 5-(*p*-tolylsulfinyl)-1,3,3a,6-tetrahydroisobenzofurans**

To a solution of the sulfoxide in a 9:1 mixture of acetone and H2O (0.1 M), at rt, 2.5 equiv of Me3NO and 0.05 equiv of OsO4 were added. The solution was stirred until starting material disappearance and then quenched with a solution of aqueous Na2S2O4 (1 M, 5 mL/mmol). The solvent was evaporated and the crude product was filtered through a short pad of silica gel.

**3.1. Synthesis of (+)-(3a*S*,4*R*,5*R*,7a*S*,*SS*)-5-*n*-Butyl-6-(*p*-tolylsulfinyl)-1,4,5,7a-tetrahydroisobenzofuran-3a,4-diol, 7, and (+)-(3a*S*,4*R*,5*R*,7a*S*,*SS*)-5-*n*-Butyl-6-(*p*-tolylsulfonyl)-1,4,5,7a-tetrahydroisobenzofuran-3a,4-diol, 8.**

From sulfoxide **3a** (32 mg, 0.100 mmol), Me3NO (28 mg, 0.250 mmol) and OsO4 (65 L, 52 mg (2.5% wt), 0.005 mmol) following the general procedure (15 min) a 96:4 mixture of **7** and **8** was obtained. Purification by chromatography (20-50% EtOAc-hexane) afforded 1 mg (0.003 mmol, 3%) of sulfone **8** as a colorless oil and 25 mg (0.072 mmol, 72%) of **7** as a white solid that was recrystallized from EtOAc-hexane.

Data of **7**: **mp**: 148-150 ºC. ***Rf*** = 0.27 (100% EtOAc). **[]20D** = +108.2 (*c* = 0.65). **1H NMR (300 MHz)-COSY**  0.88 (t, 3 H, *J* = 7.0 Hz, Me-*n*-Bu), 1.31-1.38 (m, 4 H, 2 CH2-*n*-Bu), 1.42 (m, 1 H, *n*-Bu), 1.62 (m, 1 H, *n*-Bu), 2.13 (m, 1 H, H-5), 2.38 (s, 3 H, Me-*p*-Tol), 2.39 (d, 1 H, *J* = 5.7 Hz, OH), 2.79 (s, 1 H, OH), 3.03 (ddd, 1 H, *J* = 8.7, 6.7, 4.5, 1.6 Hz, H-7a), 3.60 (d, 1 H, *J* = 9.3 Hz, 1 H-3), 3.61 (dd, 1 H, *J* = 8.8, 7.0 Hz, 1 H-1), 3.78 (t, 1 H, *J* = 6.9 Hz, H-4), 3.99 (d, 1 H, *J* = 9.3 Hz, 1 H-3), 4.25 (t, 1 H, *J* = 8.7 Hz, 1 H-1), 6.65 (dd, 1 H, *J* = 4.6, 1.7 Hz, H-7), 7.28 (d, 2 H, *J* = 7.8 Hz, *p*-Tol), 7.53 (d, 2 H, *J* = 8.3 Hz, *p*-Tol). **DNOE** between H-5/OH-4: 1.9%; between H-5/OH-3: 1.6%; between H-5/H-4: 2.1%; between H-5/H-*p*-Tol: 1.8%; between H-7a/H-1 (3.61 ppm): 4.6%; between H-7a/H-1 (4.25 ppm): 1.8%; between H-7a/H-7: 4.4%; between H-4/Me-*n*-Bu: 3.1%; between H-4/CH2-*n*-Bu: 6.8%; between H-4/H-5: 3.9%; between H-4/CH3-*p*-Tol: 4.5%; between H-3 (3.99 ppm)/H-3 (3.60 ppm): 19.0%; between H-1 (4.25 ppm)/H-7a: 5.7%; between H-1 (4.25 ppm)/H-7a: 5.7%; between H-1 (4.25 ppm)/H-1 (3.61 ppm): 20.7%. **13C NMR (50 MHz)-HMQC**  13.9 (Me-*n*-Bu), 21.5 (Me-*p*-Tol), 22.9, 27.1, 27.9, 38.9 (C-5), 47.0 (C-7a), 70.4 (C-4), 72.2 (C-1), 75.4 (C-3), 79.1 (C-3a), 126.4 (C-7), 126.8 (2 C), 130.3 (2 C), 139.0, 142.9, 143.3. **IR** (KBr): 3436, 2959, 2873, 1637, 1454, 1350, 1277, 1082, 1033, 917, 808 cm1. **MS** (ES): 351 [M+1]+ (100%). **Anal. calcd for** C19H26O4S: C, 65.11; H, 7.48; S, 9.15. **Found**: C, 64.78; H, 7.36; S, 9.40.

Data of **8**: ***Rf*** = 0.18 (50% EtOAc-hexane). **[]20D** = +43.4 (*c* = 0.58). **1H NMR (300 MHz)-COSY**  0.83 (t, 3 H, *J* = 7.1 Hz, Me-*n*-Bu), 1.17-1.45 (m, 5 H, *n*-Bu), 1.78 (m, 1 H, *n*-Bu), 1.90 (d, 1 H, *J* = 5.1 Hz, OH), 2.42 (s, 3 H, Me-*p*-Tol), 2.62 (dt, 1 H, *J* = 10.3, 3.4 Hz, H-5), 2.88 (m, 1 H, H-7a), 3.01 (s, 1 H, OH), 3.63 (d, 1 H, *J* = 10.2 Hz, 1 H-3), 3.76 (dd, 1 H, *J* = 9.0, 2.9 Hz, 1 H-1), 3.91 (d, 1 H, *J* = 10 Hz, 1 H-3), 3.98 (dd, 1 H, *J* = 4.9, 3.4 Hz, H-4), 4.15 (dd, 1 H, *J* = 8.8, 7.3 Hz, 1 H-1), 6.93 (d, 1 H, *J* = 4.6 Hz, H-7), 7.31 (d, 2 H, *J* = 8.5 Hz, *p*-Tol), 7.72 (d, 2 H, *J* = 8.5 Hz, *p*-Tol). **DNOE** between H-5/H-4: 2.0%; between H-7a/H-1 (4.15 ppm): 4.2%; between H-7a/H-7: 3.4%; between H-3 (3.63 ppm)/H-3 (3.91 ppm): 13.9%; between H-1 (3.76 ppm)/H-1 (4.15 ppm): 17.4; between H-1 (3.76 ppm)/H-7: 2.2%; between H-3 (3.91 ppm)/H-3 (3.63 ppm): 73.2%; between H-4/H-3 (3.91 ppm): 5.5%; between H-1 (4.15 ppm)/H-7a: 3.2%; H-1 (4.15 ppm)/H-1 (3.76 ppm): 12.4%. **13C NMR (50 MHz)-HMQC**  13.8 (Me-*n*-Bu), 21.6 (Me-*p*-Tol), 22.4, 29.2, 30.3, 42.5 (C-5), 47.5 (C-7a), 69.7 (C-4), 71.6 (C-1), 76.1 (C-3), 80.0 (C-3a), 128.0 (2 C), 129.9 (2 C), 136.4, 138.3, 141.3, 144.5. **IR** (film): 3435, 2962, 2925, 2862, 1642, 1597, 1261, 1147, 1088, 1020, 803, 671 cm1. **MS** (ES): 349 [(M–18)+1]+ (100%).

**3.2. Synthesis of (–)-(3a*R*,4*S*,5*S*,7a*R*,*SS*)-5-*n*-Butyl-6-(*p*-tolylsulfinyl)-1,4,5,7a-tetrahydroisobenzofuran-3a,4-diol, 9, and (–)-(3a*R*,4*S*,5*S*,7a*R*,*SS*)-5-*n*-Butyl-6-(*p*-tolylsulfonyl)-1,4,5,7a-tetrahydroisobenzofuran-3a,4-diol, 10.**

From sulfoxide **4a** (23 mg, 0.073 mmol), Me3NO (20 mg, 0.180 mmol) and OsO4 (51 L, 41 mg (2.5% wt), 0.004 mmol) following the general procedure (15 min) an 83:17 mixture of **9** and **10** was obtained. Purification by chromatography (20-50% EtOAc-hexane) afforded 8 mg (0.022 mmol, 30%) of sulfone **10** and 16 mg (0.046 mmol, 63%) of **9** as a white solid that was recrystallized from EtOAc-hexane.

Data of **9**: **mp**: 137-138 ºC. ***Rf*** = 0.21 (100% EtOAc). **[]20D** = –19.1 (*c* = 0.71). **1H NMR (300 MHz)-COSY**  0.83 (t, 3 H, *J* = 7.0 Hz, Me-*n*-Bu), 1.18-1.32 (m, 4 H, 2 CH2-*n*-Bu), 1.48-1.61 (m, 1 H, *n*-Bu), 1.73-1.83 (m, 1 H, *n*-Bu), 2.15 (br s, 1 H, OH), 2.39 (s, 3 H, Me-*p*-Tol), 2.52 (quint, 1 H, *J* = 4.4 Hz, H-5), 2.86 (dddd, 1 H, *J* = 9.0, 5.9, 4.4, 1.3 Hz, H-7a), 3.17 (br s, 1 H, OH), 3.62 (d, 1 H, *J* = 9.8 Hz, H-3), 3.70 (dd, 1 H, *J* = 8.8, 4.4 Hz, 1 H-1), 3.84 (t, 1 H, *J* = 4.9 Hz, H-4), 3.98 (d, 1 H, *J* = 9.8 Hz, 1 H-3), 4.17 (dd, 1 H, *J* = 8.8, 7.8 Hz, 1 H-1), 6.37 (dd, 1 H, *J* = 4.6, 1.0 Hz, H-7), 7.30 (d, 2 H, *J* = 8.5 Hz, *p*-Tol), 7.46 (d, 2 H, *J* = 8.3 Hz, *p*-Tol). **13C NMR (50 MHz)-HMQC**  13.9 (Me-*n*-Bu), 21.4 (Me-*p*-Tol), 22.6, 28.9, 30.2, 41.0 (C-5), 47.6 (C-7a), 70.0 (C-4), 71.9 (C-1), 75.8 (C-3), 79.7 (C-3a), 125.2 (2 C), 130.0 (2 C), 133.8 (C-7), 138.7, 141.6, 145.6. **IR** (KBr): 3466, 2955, 2870, 1630, 1413, 1309, 1082, 1022, 1004, 928, 819, 705 cm1. **MS** (ES): 701 [2M+1]+ (100%), 351 [M+1]+. **Anal. calcd for** C19H26O4S: C, 65.11; H, 7.48; S, 9.15. **Found**: C, 64.88; H, 7.19; S, 8.98.

Data of **10** is identical to that described above for **8** except for optical rotation **[]20D** = –56.44 (*c* = 0.54).

**4. General procedure for the synthesis of 2-Methoxy-2-phenyl acetic acid esters**

To a solution of the diol in CH2Cl2 (10 mL/mmol of sulfoxide), at 0 ºC, 1 equiv 2-Methoxy-2-phenylacetic acid, 1.2 equiv of dicyclohexylcarbodiimide and 0.4 equiv of dimethylaminopyridine were added. The mixture was allowed to warm to room temperature and monitored by TLC until starting material disappearance (1 h). The reaction mixture was filtered to remove dicyclohexylurea and the ester was purified by chromatography using the appropriate mixture of solvents.

**4.1. Synthesis of (+)-(3a*S*,4*R*,5*R*,7a*S*,*SS*)-5-*n*-Butyl-3a-hydroxy-6-(*p*-tolylsulfinyl)-1,3,3a,4,5,7a-hexahydroisobenzofuran-4-yl (*S*)-2-methoxy-2-phenyl acetate, 11, and (3a*S*,4*R*,5*R*,7a*S*,*SS*)-5-*n*-Butyl-3a-hydroxy-6-(*p*-tolylsulfinyl)-1,3,3a,4,5,7a-hexahydroisobenzofuran-4-yl (*R*)-2-methoxy-2-phenyl acetate, 12.**

From diol **7** (10 mg, 0.028 mmol) and ()-2-Methoxy-2-phenylacetic acid (4 mg, 0.028 mmol) following the general procedure a 50:50 mixture of **11** and **12** was obtained. Purification by chromatography afforded 12 mg (0.023 mmol, 83%) of **11** and **12**.

In an identical experiment with (+)-2-Methoxy-2-phenylacetic acid, 14 mg (0.027 mmol, 96%) of **11** was obtained as a white solid that was recrystallized from EtOAc-hexane. The 1H NMR of the crude product did not show any signal of compound **12** and thus the optical purity of **7** was established.

Data of **11**: **mp**: 60-61 ºC. ***Rf*** = 0.33 (100% EtOAc). **[]20D** = +51.0 (*c* = 1.23). **1H NMR (300 MHz)**  0.79 (t, 3 H, *J* = 7.3 Hz, Me-*n*-Bu), 0.99-1.27 (m, 6 H, *n*-Bu), 2.21 (m, 2 H, H-5, OH), 2.39 (s, 3 H, Me-*p*-Tol), 3.03 (m, 1 H, H-7a), 3.32 (s, 3 H, OMe), 3.48 (d, 1 H, *J* = 9.3 Hz, 1 H-3), 3.62 (d, 1 H, *J* = 9.5 Hz, 1 H-3), 3.64 (t, 1 H, *J* = 8.1 Hz, H-1), 4.24 (t, 1 H, *J* = 8.7 Hz, H-1), 4.70 (s, 1 H, H), 5.21 (d, 1 H, *J* = 7.8 Hz, H-4), 6.66 (dd, 1 H, *J* = 4.4, 1.9 Hz, H-7), 7.26 (d, 2 H, *J* = 7.8 Hz, *p*-Tol), 7.34 (m, 5 H, Ph), 7.48 (d, 2 H, *J* = 8.1 Hz, *p*-Tol). **13C NMR (50 MHz)**  13.7 (Me-*n*-Bu), 21.5 (Me-*p*-Tol), 22.6, 26.5, 27.1, 37.0 (C-5), 47.7 (C-7a), 57.4 (OMe), 71.9 (C-4), 73.4 (C-1), 75.2 (C-3), 78.8 (C-3a), 82.8 (C), 125.8, 126.7 (2 C), 126.8 (2 C), 128.8 (2 C), 129.1, 130.3 (2 C), 135.8, 139.3, 142.8, 143.2, 170.0. **IR** (KBr): 3436, 2956, 2930, 2868, 1750, 1638, 1456, 1174, 1108, 1039, 811, 733, 698 cm1. **MS** (ES): 499 [M+1]+ (100%). **Anal. calcd for** C28H34O6S: C, 67.44; H, 6.87; S, 6.43. **Found**: C, 67.57; H, 7.02; S, 6.70.

Data of **12** (obtained from the 1H NMR of a mixture of **11** and **12**): ***Rf*** = 0.27 (100% EtOAc). **1H NMR (300 MHz)**  0.85 (t, 3 H, *J* = 7.3 Hz, Me-*n*-Bu), 2.10-2.24 (m, 2 H, H-5, OH), 2.40 (s, 3 H, Me-*p*-Tol), 2.75 (m, 1 H, H-7a), 3.30 (s, 3 H, OMe), 3.52 (d, 1 H, *J* = 9.8 Hz, 1 H-3), 3.62 (m, 2 H, 1 H-1, 1 H-3), 4.10 (dd, 1 H, *J* = 8.7, 7.7 Hz, 1 H-1), 4.48 (s, 1 H, H), 5.11 (d, 1 H, *J* = 5.6 Hz, H-4), 6.62 (dd, 1 H, *J* = 4.4, 1.5 Hz, H-7), 7.30-7.36 (m, 7 H), 7.52 (d, 2 H, *J* = 8.1 Hz).

**4.2. Synthesis of (+)-(3a*R*,4*S*,5*S*,7a*R*,*SS*)-5-*n*-Butyl-3a-hydroxy-6-(*p*-tolylsulfinyl)-1,3,3a,4,5,7a-hexahydroisobenzofuran-4-yl (*S*)-2-methoxy-2-phenyl acetate, 13, and (3a*R*,4*S*,5*S*,7a*R*,*SS*)-5-*n*-Butyl-3a-hydroxy-6-(*p*-tolylsulfinyl)-1,3,3a,4,5,7a-hexahydroisobenzofuran-4-yl (*R*)-2-methoxy-2-phenyl acetate, 14.**

From diol **9** (8 mg, 0.023 mmol) and ()-2-Methoxy-2-phenylacetic acid (4 mg, 0.023 mmol) following the general procedure a 50:50 mixture of **13** and **14** was obtained. Purification by chromatography afforded 5 mg (0.020 mmol, 45%) of **13** and 5 mg (0.020 mmol, 45%) of **14** as white solids.

In an identical experiment with (+)-2-Methoxy-2-phenyl acetic acid 10 mg (0.020 mmol, 90%) of **13** was obtained as a white solid that was recrystallized from EtOAc-hexane. The 1H NMR of the crude product did not show any signal of compound **14** and thus the optical purity of **9** was established.

Data of **13**: **mp**: 57 ºC. ***Rf*** = 0.30 (100% EtOAc). **[]20D** = +49.2 (*c* = 0.65). **1H NMR (300 MHz)**  0.82 (t, 3 H, *J* = 7.2 Hz, Me-*n*-Bu), 1.14-1.47 (m, 5 H, *n*-Bu), 1.74 (m, 1 H), 2.41 (s, 3 H, Me-*p*-Tol), 2.49-2.57 (m, 2 H, H-5, H-7a), 3.29 (s, 3 H, O-Me), 3.43 (d, 1 H, *J* = 10.2 Hz, 1 H-3), 3.76 (dd, 1 H, *J* = 8.8, 2.7 Hz, 1 H-1), 3.78 (d, 1 H, *J* = 10.7 Hz, 1 H-3), 4.02 (dd, 1 H, *J* = 8.7, 6.7 Hz, 1 H-1), 4.31 (s, 1 H, H), 5.11 (d, 1 H, *J* = 3.2 Hz, H-4), 6.44 (d, 1 H, *J* = 4.1 Hz, H-7), 7.27-7.39 (m, 7 H), 7.47 (d, 2 H, *J* = 8.3 Hz, *p*-Tol). **13C NMR (75 MHz)**  13.8 (Me-*n*-Bu), 21.4 (Me-*p*-Tol), 22.2, 28.8, 31.1, 39.1 (C-5), 48.3 (C-7a), 57.2 (OMe), 71.8 (C-4), 73.0 (C-1), 76.0 (C-3), 79.3 (C-3a), 81.7 (C), 125.0 (2 C), 126.9 (2 C), 129.1 (2 C), 129.4, 129.9 (2 C), 133.2, 136.3, 139.5, 141.4, 145.5, 169.1 (CO). **IR** (KBr): 3434, 2959, 2926, 2870, 1749, 1631, 1493, 1455, 1261, 1172, 1102, 1082, 1029, 808, 729, 697 cm1. **MS** (ES): 499 [M+1]+ (100%).

Data of **14**: ***Rf*** = 0.25 (100% EtOAc). **1H NMR (300 MHz)**  0.73 (t, 3 H, *J* = 7.1 Hz, Me-*n*-Bu), 1.00-1.36 (m, 6 H), 2.24 (br s, 1 H, OH), 2.40 (s, 3 H, Me-*p*-Tol), 2.50 (m, 1 H, H-5), 2.88 (dtd, 1 H, *J* = 7.3, 4.1, 1.5 Hz, H-7a), 3.34 (s, 3 H, OMe), 3.57 (d, 1 H, *J* = 9.8 Hz, 1 H-3), 3.76 (dd, 1 H, *J* = 8.8, 4.4 Hz, 1 H-1), 3.82 (d, 1 H, *J* = 9.8 Hz, 1 H-3), 4.17 (dd, 1 H, *J* = 8.6, 7.4 Hz, 1 H-1), 4.66 (s, 1 H, H), 5.17 (d, 1 H, *J* = 4.4 Hz, H-4), 6.43 (dd, 1 H, *J* = 4.1, 1.2 Hz, H-7), 7.27 (d, 2 H, *J* = 8.1 Hz, *p*-Tol), 7.34 (m, 5 H), 7.42 (d, 2 H, *J* = 8.3 Hz, *p*-Tol).

**5. Synthesis of 5-*n*-Butyl-6-*p*-tolylsulfinyl-1,3-dihydroisobenzofuran, 6.**

A solution of a 73:23 mixture of cycloadducts **3a** and **4a** (33 mg, 0.10 mmol) and 1.5 equiv of DDQ (35 mg, 0.16 mmol), in 1 mL of dioxane, was heated at 60 ºC until starting material disappearance (12 h). The solvent was evaporated and the crude product was purified by chromatography on silica gel (20% EtOAc-hexane) to give 25 mg of **6** (0.08 mmol, 80%) as a white solid that was recrystallized from Et2O-hexane.

Data of **6**: **mp**: 85-87 ºC. ***Rf*** = 0.32 (50% EtOAc-hexane). **[]20D** = 9.0 (*c* = 0.60). **1H NMR (300 MHz)**  0.88 (t, 3 H, *J* = 7.2 Hz, Me-*n*-Bu), 1.26-1.42 (m, 2 H, CH2-*n*- Bu), 1.50-1.60 (m, 2 H, CH2-*n*-Bu), 2.36 (s, 3 H, Me-*p*-Tol), 2.60 (ddd, 1 H, *J* = 14.5, 10.0, 5.0 Hz, 1 H-1'), 2.77 (ddd, 1 H, *J* = 15.3, 9.5, 5.9 Hz, 1 H-1'), 5.08 (s, 4 H, 2 H-1, 2 H-3), 7.06 (s, 1 H, H-4), 7.23 (d, 2 H, *J* = 8.3 Hz, *p*-Tol), 7.47 (d, 2 H, *J* = 8.3 Hz, *p*-Tol), 7.79 (s, 1 H, H-7). **13C NMR (50 MHz)**  13.8 (Me-*n*-Bu), 21.4 (Me-*p*-Tol), 22.6, 31.7, 33.2, 73.3 (2 C), 117.6, 122.0, 125.9, (2 C), 130.0 (2 C), 138.4, 140.2, 141.7, 142.4, 142.7. **IR** (KBr): 3040, 2958, 2926, 2854, 1698, 1636, 1594, 1492, 1455, 1399, 1377, 1303, 1261, 1179, 1083, 1047, 901, 873, 809, 735, 706 cm1. **MS** (ES): 315 [M+1]+ (100%). **Anal. calcd for** C19H22O2S: C,72.57; H, 7.05; S, 10.20. **Found**: C,72.81; H, 7.04; S, 10.40.

**6. Structural assignments**

**6.1. Structural assignment for cycloadducts 3 and 4**

The relative *cis-trans* stereochemistry between the substituents at C3a and C6 was derived from the characteristic homoallylic coupling of 1,4-cyclohexadienes. The coupling constants *J*H3a-H6 of cycloadducts **3f** and **4f** (figure 1) are in good agreement with previous data that reported values of 9.1 Hz and 5.3 Hz respectively for related *cis* and *trans* compounds.3 For all **3** and **4** cycloadducts the assignment was made by assuming a similar stereochemical course for the IMDA and by comparison of their spectral features with those of compounds **3f** and **4f**.

**Figure 1**

**6.2. Assignment for diols 7, 8, 9 and 10**

**6.2.1. Relative stereochemistry**

This assignment was based on the coupling constants of the diols and Nuclear Overhauser (NOE) experiments. The absence of NOE effect between H4 and H7a in compound **7** (figure 2) is in agreement with a *cis* fusion and the coupling constant *J*7-7a (4.6 Hz) is in agreement with previously reported data for *cis* (*J* = 3-4 Hz) and *trans* (*J* = 1-1.5 Hz) related compounds.4a, b In the *cis*-ring fusion isomer the dihedral angle between H7 and H7a is about 20-30º which is in agreement with a coupling constant of 4.6 Hz. However in the *trans* isomer the angle would be close to 90º so the coupling constant value should be very small. These arguments support approach by osmium to the less hindered face of the 1,4 cyclohexadiene moiety. The stereochemical assignment of diol **9** was made similarly.

**Figure 2**

The coupling constant of 4.6 Hz and the absence of NOE between H7a and H4 for diol **10** establish that enantiomeric sulfones **8** and **10** do not proceed from sulfoxide oxidation of a *trans*-fused isomer and thus the stereoespecificity of the dihydroxylation reaction is demonstrated.

**6.2.2. Absolute stereochemistry**

To determine the absolute stereochemistry of diols **7** and **9** we synthesized the corresponding (*S*) and (*R*)-methoxy phenylacetates **11**, **12**, **13** and **14**. Previous studies suggest that in the L2L1CH-CO-CHPh-OMe fragment the preferred conformer in each case is that where the C-OMe bond, the C=O and the C4-H4 bond are nearly eclipsed.5 For the C-S bond we suggest that the main conformer in each case is the one that places the bulky *p*-tolyl group away from the bicyclo concave face. As shown in figure 3, H7a, H1 and H are further upfield in the (*R*)-isomer **12** due to the shielding effect of the phenyl group (on H7a and H1) and the *p*-tolyl group (on H). In contrast, in the (*S*)-isomer **13**, the phenyl group is shielding the methyl group of the *n*-butyl chain. The absolute stereochemical assignment for esters **13** and **14** was made similarly.

**Figure 3**

**7. References**

**1**. (a) For an amino-Mitsunobu reaction with *N*-(Prop-2-ynyl)-*p*-tolylsulfonamide see: Y. Xiong, H. W. Moore, *J. Org. Chem*.*,* 1996, **61**, 9168-9177. (b) For Mitsunobu reactions with bis-sulfonyl methanes see: J. Yu, H. Cho, J. R. Falck, *J. Org. Chem.,* 1993, **58**, 5892-5894.

**2**. W. Oppolzer, J. Ruiz-Montes, *J. Helv. Chim. Acta,* 1993, **76**, 1266-1274.

**3**. P. A. Wender, T. E. Smith, *J. Org. Chem.,* 1995, **60**, 2962-2963.

**4**. (a) P. Areces, J. L. Jiménez, M. C. Pozo, E. Roman, J. A. Serrano, *J. Chem. Soc., Perkin Trans.1,* 2001, 754-762. (b) J. Becher, H. C. Nielsen, J. P. Jacobsen, O. Simonsen, H. Clausen, *J. Org. Chem.,* 1988, **53**, 1862-1871.

**5**. S. K. Latypov, J. M. Seco, E. Quiñoá, R. Riguera, *J. Org. Chem.,* 1996, **61**, 8569-8577.
